# Supplementary material for: Do microplastic particles affect Daphnia magna at the morphological, life history and molecular level?
Source: PLOS journal article supplement (doi:10.1371/journal.pone.0187590), 2017-11-16
Supplement: S7 (10.1371/journal.pone.0187590.s007) [file journal.pone.0187590.s007]

## S4 File. Supporting results: Morphology and life-history parameters

### *Morphology parameters of adult Daphnia magna*

#### Body length

Table S1. PERMANOVA test results of the body length of the three *D. magna* clones BL2.2, K34J and Max4. PERMANOVA with the time point of the measurements (48h after primiparity and the carrying time of the 3<sup>rd</sup> and 5<sup>th</sup> clutch) as additional fixed factor.

|              | PERMANOVA                          |    |       |                                         |    |        |
|--------------|------------------------------------|----|-------|-----------------------------------------|----|--------|
| fixed factor | Body length<br>(response variable) |    |       | time point<br>(additional fixed factor) |    |        |
|              | Pseudo-F                           | df | p(MC) | Pseudo-F                                | df | p(MC)  |
| BL2.2        | 0.60959                            | 6  | 0.719 | 1177.1                                  | 2  | <0.001 |
| K34J         | 0.70056                            | 6  | 0.649 | 1914.9                                  | 2  | <0.001 |
| Max4         | 1.4875                             | 6  | 0.186 | 1189.6                                  | 2  | <0.001 |

Table S2. PERMDISP test results of the body length of the three *D. magna* clones BL2.2, K34J and Max4. Individual PERMDISP tests were performed for each time point of the measurements (48h after primiparity and the carrying time of the 3<sup>rd</sup> and 5<sup>th</sup> clutch).

|       |                        | PERMDISP                           |                 |                 |        |                      |               |       |
|-------|------------------------|------------------------------------|-----------------|-----------------|--------|----------------------|---------------|-------|
|       |                        | Body length<br>(response variable) |                 |                 |        | Pairwise comparisons |               |       |
|       | time point             | F                                  | df <sub>1</sub> | df <sub>2</sub> | p      | Treatment A          | Treatment B   | p     |
| BL2.2 | 48h after primiparity  | 0.2125                             | 2               | 51              | 0.832  | control              | plastic mix A | -     |
|       |                        |                                    |                 |                 |        |                      | plastic mix B | -     |
|       | 3 <sup>rd</sup> clutch | 2.9507                             | 2               | 51              | 0.064  | control              | plastic mix A | -     |
|       |                        |                                    |                 |                 |        |                      | plastic mix B | -     |
|       | 5 <sup>th</sup> clutch | 0.4148                             | 2               | 51              | 0.722  | control              | plastic mix A | -     |
|       |                        |                                    |                 |                 |        |                      | plastic mix B | -     |
| K34J  | 48h after primiparity  | 2.7359                             | 2               | 51              | 0.077  | control              | plastic mix A | -     |
|       |                        |                                    |                 |                 |        |                      | plastic mix B | -     |
|       | 3 <sup>rd</sup> clutch | 1.4402                             | 2               | 50              | 0.253  | control              | plastic mix A | -     |
|       |                        |                                    |                 |                 |        |                      | plastic mix B | -     |
|       | 5 <sup>th</sup> clutch | 1.4714                             | 2               | 50              | 0.279  | control              | plastic mix A | -     |
|       |                        |                                    |                 |                 |        |                      | plastic mix B | -     |
| Max4  | 48h after primiparity  | 12.166                             | 2               | 51              | <0.001 | control              | plastic mix A | 0.005 |
|       |                        |                                    |                 |                 |        |                      | plastic mix B | 0.001 |
|       | 3 <sup>rd</sup> clutch | 1.5714                             | 2               | 50              | 0.224  | control              | plastic mix A | -     |
|       |                        |                                    |                 |                 |        |                      | plastic mix B | -     |
|       | 5 <sup>th</sup> clutch | 2.6134                             | 2               | 48              | 0.089  | control              | plastic mix A | -     |
|       |                        |                                    |                 |                 |        |                      | plastic mix B | -     |

## Body width

Table S3. PERMANOVA test results of the body width of the three *D. magna* clones BL2.2, K34J and Max4. PERMANOVA was performed with the time point of the measurements (48h after primiparity and the carrying time of the 3<sup>rd</sup> and 5<sup>th</sup> clutch) as additional fixed factor and the body length as covariate to compensate for size-dependent differences. The interaction term body width  $\times$  body length was non-significant for all clones.

|              | PERMANOVA                         |    |              |                            |    |        |                                         |    |        |
|--------------|-----------------------------------|----|--------------|----------------------------|----|--------|-----------------------------------------|----|--------|
| Fixed factor | Body width<br>(response variable) |    |              | Body length<br>(covariate) |    |        | Time point<br>(additional fixed factor) |    |        |
|              | Pseudo-F                          | df | p(MC)        | Pseudo-F                   | df | p(MC)  | Pseudo-F                                | df | p(MC)  |
| BL2.2        | 3.4489                            | 6  | <b>0.003</b> | 8484.8                     | 1  | <0.001 | 9.1167                                  | 2  | <0.001 |
| K34J         | 1.237                             | 6  | 0.304        | 10267                      | 1  | <0.001 | 57.215                                  | 2  | <0.001 |
| Max4         | 0.46547                           | 6  | 0.831        | 6781.7                     | 1  | <0.001 | 12.674                                  | 2  | <0.001 |

Table S4. Pairwise comparisons of the body width 48h after primiparity and the carrying time of the 3<sup>rd</sup> and 5<sup>th</sup> clutch.

|       |                        | Pairwise comparisons |               |              |
|-------|------------------------|----------------------|---------------|--------------|
|       | Time point             | Treatment A          | Treatment B   | p(MC)        |
| BL2.2 | 48h after primiparity  | control              | plastic mix A | 0.752        |
|       |                        |                      | plastic mix B | 0.580        |
|       | 3 <sup>rd</sup> clutch | control              | plastic mix A | 0.072        |
|       |                        |                      | plastic mix B | <b>0.023</b> |
|       | 5 <sup>th</sup> clutch | control              | plastic mix A | 0.182        |
|       |                        |                      | plastic mix B | 0.134        |

Table S5. PERMDISP test results of the body width of the three *D. magna* clones BL2.2, K34J and Max4. Individual PERMDISP tests were performed for each time point of the measurements (48h after primiparity and the carrying time of the 3<sup>rd</sup> and 5<sup>th</sup> clutch).

|       |                        | PERMDISP                          |                 |                 |       |                      |               |   |
|-------|------------------------|-----------------------------------|-----------------|-----------------|-------|----------------------|---------------|---|
|       |                        | Body width<br>(response variable) |                 |                 |       | Pairwise comparisons |               |   |
|       | Time point             | F                                 | df <sub>1</sub> | df <sub>2</sub> | p     | Treatment A          | Treatment B   | p |
| BL2.2 | 48h after primiparity  | 0.62082                           | 2               | 51              | 0.570 | control              | plastic mix A | - |
|       |                        |                                   |                 |                 |       |                      | plastic mix B | - |
|       | 3 <sup>rd</sup> clutch | 0.19698                           | 2               | 51              | 0.832 | control              | plastic mix A | - |
|       |                        |                                   |                 |                 |       |                      | plastic mix B | - |
|       | 5 <sup>th</sup> clutch | 0.36649                           | 2               | 51              | 0.715 | control              | plastic mix A | - |
|       |                        |                                   |                 |                 |       |                      | plastic mix B | - |
| K34J  | 48h after primiparity  | 0.45502                           | 2               | 51              | 0.640 | control              | plastic mix A | - |
|       |                        |                                   |                 |                 |       |                      | plastic mix B | - |
|       | 3 <sup>rd</sup> clutch | 0.40192                           | 2               | 50              | 0.677 | control              | plastic mix A | - |
|       |                        |                                   |                 |                 |       |                      | plastic mix B | - |
|       | 5 <sup>th</sup> clutch | 0.14675                           | 2               | 50              | 0.892 | control              | plastic mix A | - |
|       |                        |                                   |                 |                 |       |                      | plastic mix B | - |
| Max4  | 48h after primiparity  | 0.22638                           | 2               | 51              | 0.812 | control              | plastic mix A | - |
|       |                        |                                   |                 |                 |       |                      | plastic mix B | - |
|       | 3 <sup>rd</sup> clutch | 0.09724                           | 2               | 50              | 0.917 | control              | plastic mix A | - |
|       |                        |                                   |                 |                 |       |                      | plastic mix B | - |
|       | 5 <sup>th</sup> clutch | 0.36032                           | 2               | 48              | 0.692 | control              | plastic mix A | - |
|       |                        |                                   |                 |                 |       |                      | plastic mix B | - |

## Tail spine length

Table S6. PERMANOVA test results of the tail spine length of the three *D. magna* clones BL2.2, K34J and Max4. PERMANOVA was performed with the time point of the measurements (48h after primiparity and the carrying time of the 3<sup>rd</sup> and 5<sup>th</sup> clutch) as additional fixed factor and the body length as covariate to compensate for size-dependent differences. The interaction term body width  $\times$  body length was non-significant for all clones.

|              | PERMANOVA                                |    |              |                            |    |        |                                         |    |        |
|--------------|------------------------------------------|----|--------------|----------------------------|----|--------|-----------------------------------------|----|--------|
| fixed factor | Tail spine length<br>(response variable) |    |              | Body length<br>(covariate) |    |        | Time point<br>(additional fixed factor) |    |        |
|              | Pseudo-F                                 | df | p(MC)        | Pseudo-F                   | df | p(MC)  | Pseudo-F                                | df | p(MC)  |
| BL2.2        | 3.2958                                   | 6  | <b>0.005</b> | 9.9969                     | 1  | 0.002  | 53.9430                                 | 2  | <0.001 |
| K34J         | 0.7002                                   | 6  | 0.654        | 4.7712                     | 1  | 0.031  | 7.1971                                  | 2  | <0.001 |
| Max4         | 2.6069                                   | 6  | <b>0.020</b> | 13.0300                    | 1  | <0.001 | 4.3518                                  | 2  | 0.014  |

Table S7. Pairwise comparisons of the tail spine length 48h after primiparity and the carrying time of the 3<sup>rd</sup> and 5<sup>th</sup> clutch. For Max4 the interaction term was significant, therefore, analysis was additionally performed without the body length as covariate.

|       |                       | Pairwise comparisons |               |                  |
|-------|-----------------------|----------------------|---------------|------------------|
|       |                       | Treatment A          | Treatment B   | p(MC)            |
| BL2.2 | 48h after primiparity | control              | plastic mix A | 0.948            |
|       |                       |                      | plastic mix B | 0.776            |
|       | 3rd clutch            | control              | plastic mix A | 0.347            |
|       |                       |                      | plastic mix B | 0.622            |
|       | 5th clutch            | control              | plastic mix A | <b>&lt;0.001</b> |
|       |                       |                      | plastic mix B | 0.743            |
| Max4  | 48h after primiparity | control              | plastic mix A | <b>0.012</b>     |
|       |                       |                      | plastic mix B | 0.199            |
|       | 3rd clutch            | control              | plastic mix A | 0.301            |
|       |                       |                      | plastic mix B | 0.657            |
|       | 5th clutch            | control              | plastic mix A | 0.143            |
|       |                       |                      | plastic mix B | 0.680            |

Table S8. PERMDISP test results of the tail spine length of the three *D. magna* clones BL2.2, K34J and Max4. Individual PERMDISP tests were performed for each time point of the measurements (48h after primiparity and the carrying time of the 3<sup>rd</sup> and 5<sup>th</sup> clutch).

|       |                        | PERMDISP                                 |                 |                 |              |                      |               |              |
|-------|------------------------|------------------------------------------|-----------------|-----------------|--------------|----------------------|---------------|--------------|
|       |                        | Tail spine length<br>(response variable) |                 |                 |              | Pairwise comparisons |               |              |
|       | Time point             | F                                        | df <sub>1</sub> | df <sub>2</sub> | p            | Treatment A          | Treatment B   | p            |
| BL2.2 | 48h after primiparity  | 2.5603                                   | 2               | 48              | 0.089        | control              | plastic mix A | -            |
|       |                        |                                          |                 |                 |              |                      | plastic mix B | -            |
|       | 3 <sup>rd</sup> clutch | 1.2855                                   | 2               | 49              | 0.325        | control              | plastic mix A | -            |
|       |                        |                                          |                 |                 |              |                      | plastic mix B | -            |
|       | 5 <sup>th</sup> clutch | 1.9561                                   | 2               | 51              | 0.210        | control              | plastic mix A | -            |
|       |                        |                                          |                 |                 |              |                      | plastic mix B | -            |
| K34J  | 48h after primiparity  | 1.2777                                   | 2               | 61              | 0.489        | control              | plastic mix A | -            |
|       |                        |                                          |                 |                 |              |                      | plastic mix B | -            |
|       | 3 <sup>rd</sup> clutch | 0.0381                                   | 2               | 50              | 0.969        | control              | plastic mix A | -            |
|       |                        |                                          |                 |                 |              |                      | plastic mix B | -            |
|       | 5 <sup>th</sup> clutch | 0.98507                                  | 2               | 49              | 0.543        | control              | plastic mix A | -            |
|       |                        |                                          |                 |                 |              |                      | plastic mix B | -            |
| Max4  | 48h after primiparity  | 1.4647                                   | 2               | 50              | 0.340        | control              | plastic mix A | -            |
|       |                        |                                          |                 |                 |              |                      | plastic mix B | -            |
|       | 3 <sup>rd</sup> clutch | 1.2315                                   | 2               | 48              | 0.307        | control              | plastic mix A | -            |
|       |                        |                                          |                 |                 |              |                      | plastic mix B | -            |
|       | 5 <sup>th</sup> clutch | 3.5844                                   | 2               | 45              | <b>0.037</b> | control              | plastic mix A | 0.208        |
|       |                        |                                          |                 |                 |              |                      | plastic mix B | <b>0.012</b> |

## Reproduction of *Daphnia magna*

### Number of neonates

Table S9. PERMANOVA test results of the produced number of neonates during the experimental period of the three *D. magna* clones BL2.2, K34J and Max4. PERMANOVA with the time point of the measurements (1<sup>st</sup> clutch – 5<sup>th</sup> clutch) as additional fixed factor.

|              | PERMANOVA                                 |    |       |                                         |    |        |
|--------------|-------------------------------------------|----|-------|-----------------------------------------|----|--------|
| fixed factor | Number of neonates<br>(response variable) |    |       | Time point<br>(additional fixed factor) |    |        |
|              | Pseudo-F                                  | df | p(MC) | Pseudo-F                                | df | p(MC)  |
| BL2.2        | 1.329                                     | 6  | 0.212 | 263.14                                  | 4  | <0.001 |
| K34J         | 0.84693                                   | 6  | 0.581 | 300.28                                  | 4  | <0.001 |
| Max4         | 0.33732                                   | 6  | 0.969 | 89.631                                  | 4  | <0.001 |

Table S10. PERMDISP test results of the produced number of neonates of the three *D. magna* clones BL2.2, K34J and Max4. Individual PERMDISP tests were performed for each time point of the measurements (1<sup>st</sup> clutch – 5<sup>th</sup> clutch).

|       |        | PERMDISP                                  |                 |                 |       |                      |               |   |
|-------|--------|-------------------------------------------|-----------------|-----------------|-------|----------------------|---------------|---|
|       |        | Number of neonates<br>(response variable) |                 |                 |       | Pairwise comparisons |               |   |
|       | clutch | F                                         | df <sub>1</sub> | df <sub>2</sub> | p     | Treatment A          | Treatment B   | p |
| BL2.2 | 1      | 0.7847                                    | 2               | 51              | 0.467 | control              | plastic mix A | - |
|       |        |                                           |                 |                 |       |                      | plastic mix B | - |
|       | 2      | 1.4774                                    | 2               | 51              | 0.278 | control              | plastic mix A | - |
|       |        |                                           |                 |                 |       |                      | plastic mix B | - |
|       | 3      | 1.0144                                    | 2               | 51              | 0.370 | control              | plastic mix A | - |
|       |        |                                           |                 |                 |       |                      | plastic mix B | - |
|       | 4      | 0.4670                                    | 2               | 51              | 0.638 | control              | plastic mix A | - |
|       |        |                                           |                 |                 |       |                      | plastic mix B | - |
|       | 5      | 2.0373                                    | 2               | 51              | 0.148 | control              | plastic mix A | - |
|       |        |                                           |                 |                 |       |                      | plastic mix B | - |
| K34J  | 1      | 0.7630                                    | 2               | 51              | 0.543 | control              | plastic mix A | - |
|       |        |                                           |                 |                 |       |                      | plastic mix B | - |
|       | 2      | 2.0298                                    | 2               | 50              | 0.142 | control              | plastic mix A | - |
|       |        |                                           |                 |                 |       |                      | plastic mix B | - |
|       | 3      | 1.6565                                    | 2               | 50              | 0.219 | control              | plastic mix A | - |
|       |        |                                           |                 |                 |       |                      | plastic mix B | - |
|       | 4      | 1.9104                                    | 2               | 50              | 0.164 | control              | plastic mix A | - |
|       |        |                                           |                 |                 |       |                      | plastic mix B | - |
|       | 5      | 0.3750                                    | 2               | 49              | 0.708 | control              | plastic mix A | - |
|       |        |                                           |                 |                 |       |                      | plastic mix B | - |
| Max4  | 1      | 0.2113                                    | 2               | 51              | 0.827 | control              | plastic mix A | - |
|       |        |                                           |                 |                 |       |                      | plastic mix B | - |
|       | 2      | 0.1231                                    | 2               | 51              | 0.884 | control              | plastic mix A | - |
|       |        |                                           |                 |                 |       |                      | plastic mix B | - |
|       | 3      | 0.2169                                    | 2               | 49              | 0.824 | control              | plastic mix A | - |
|       |        |                                           |                 |                 |       |                      | plastic mix B | - |
|       | 4      | 2.0160                                    | 2               | 48              | 0.162 | control              | plastic mix A | - |
|       |        |                                           |                 |                 |       |                      | plastic mix B | - |
|       | 5      | 0.9155                                    | 2               | 43              | 0.577 | control              | plastic mix A | - |
|       |        |                                           |                 |                 |       |                      | plastic mix B | - |

### Number of males

For the clone BL2.2 males occurred at the end of the experiment in the 5<sup>th</sup> clutch in two replicates of the control, in 3 replicates of the group fed with plastic mix A and in 4 replicates fed with plastic mix B. In the control  $7.0 \pm 7.2$  % of the clutch were males. In the treatment fed with plastic mix A and B  $2.9 \pm 1.6$  % and  $6.8 \pm 5.2$  % of the clutch were males. In the clone Max4 also males started to appear in the 5<sup>th</sup> clutch. Herein 4 replicates in the control treatment with  $55.4 \pm 42.8$  % males and 3 replicates of the treatment fed with plastic mix B with  $69.7 \pm 35.2$  % males. In the clone K34J no males appeared.

## *Morphology parameters of the produced juveniles by Daphnia magna*

### Body length

Table S11. PERMANOVA test results of the body length of produced neonates of the three *D. magna* clones BL2.2, K34J and Max4 during the experimental period. Nested PERMANOVA was performed with the time point of the measurements (1<sup>st</sup>, 3<sup>rd</sup> & 5<sup>th</sup> clutch as additional fixed factor.

|              | Nested PERMANOVA                   |    |              |                                         |    |        |
|--------------|------------------------------------|----|--------------|-----------------------------------------|----|--------|
| fixed factor | Body length<br>(response variable) |    |              | Time point<br>(additional fixed factor) |    |        |
|              | Pseudo-F                           | df | p(MC)        | Pseudo-F                                | df | p(MC)  |
| BL2.2        | 2.1107                             | 6  | 0.056        | 397.81                                  | 2  | <0.001 |
| K34J         | 2.3641                             | 6  | <b>0.032</b> | 397.21                                  | 2  | <0.001 |
| Max4         | 4.3105                             | 6  | <0.001       | 163.15                                  | 2  | <0.001 |

Table S12. Pairwise comparisons of the body length of produced neonates in the 1<sup>st</sup>, 3<sup>rd</sup> and 5<sup>th</sup> clutch.

|       |            | Pairwise comparisons |               |              |
|-------|------------|----------------------|---------------|--------------|
|       |            | Treatment A          | Treatment B   | p(MC)        |
| BL2.2 | 1st clutch | control              | plastic mix A | 0.598        |
|       |            |                      | plastic mix B | 0.737        |
|       | 3rd clutch | control              | plastic mix A | 0.019        |
|       |            |                      | plastic mix B | 0.269        |
|       | 5th clutch | control              | plastic mix A | 0.480        |
|       |            |                      | plastic mix B | 0.007        |
| K34J  | 1st clutch | control              | plastic mix A | 0.845        |
|       |            |                      | plastic mix B | 0.418        |
|       | 3rd clutch | control              | plastic mix A | <b>0.038</b> |
|       |            |                      | plastic mix B | 0.075        |
|       | 5th clutch | control              | plastic mix A | 0.971        |
|       |            |                      | plastic mix B | <b>0.021</b> |
| Max4  | 1st clutch | control              | plastic mix A | <b>0.012</b> |
|       |            |                      | plastic mix B | 0.156        |
|       | 3rd clutch | control              | plastic mix A | 0.377        |
|       |            |                      | plastic mix B | <b>0.028</b> |
|       | 5th clutch | control              | plastic mix A | 0.665        |
|       |            |                      | plastic mix B | 0.066        |



Table S13. PERMDISP test results of the body length of produced neonates of the three *D. magna* clones BL2.2, K34J and Max4. Individual PERMDISP tests were performed for each time point of the measurements (1<sup>st</sup>, 3<sup>rd</sup> & 5<sup>th</sup> clutch).

|       |            | PERMDISP                           |                 |                 |              |                      |               |              |
|-------|------------|------------------------------------|-----------------|-----------------|--------------|----------------------|---------------|--------------|
|       |            | Body length<br>(response variable) |                 |                 |              | Pairwise comparisons |               |              |
|       | Time point | F                                  | df <sub>1</sub> | df <sub>2</sub> | p            | Treatment A          | Treatment B   | p            |
| BL2.2 | 1st clutch | 1.2324                             | 2               | 267             | 0.359        | control              | plastic mix A | -            |
|       |            |                                    |                 |                 |              |                      | plastic mix B | -            |
|       | 3rd clutch | 5.3292                             | 2               | 267             | <b>0.007</b> | control              | plastic mix A | <b>0.003</b> |
|       |            |                                    |                 |                 |              |                      | plastic mix B | <b>0.025</b> |
|       | 5th clutch | 2.7361                             | 2               | 267             | 0.063        | control              | plastic mix A | -            |
|       |            |                                    |                 |                 |              |                      | plastic mix B | -            |
| K34J  | 1st clutch | 1.945                              | 2               | 267             | 0.141        | control              | plastic mix A | -            |
|       |            |                                    |                 |                 |              |                      | plastic mix B | -            |
|       | 3rd clutch | 0.63512                            | 2               | 262             | 0.557        | control              | plastic mix A | -            |
|       |            |                                    |                 |                 |              |                      | plastic mix B | -            |
|       | 5th clutch | 0.43778                            | 2               | 257             | 0.650        | control              | plastic mix A | -            |
|       |            |                                    |                 |                 |              |                      | plastic mix B | -            |
| Max4  | 1st clutch | 3.0801                             | 2               | 267             | <b>0.045</b> | control              | plastic mix A | 0.077        |
|       |            |                                    |                 |                 |              |                      | plastic mix B | <b>0.026</b> |
|       | 3rd clutch | 4.6267                             | 2               | 257             | <b>0.017</b> | control              | plastic mix A | <b>0.039</b> |
|       |            |                                    |                 |                 |              |                      | plastic mix B | 0.577        |
|       | 5th clutch | 0.80095                            | 2               | 225             | 0.506        | control              | plastic mix A | -            |
|       |            |                                    |                 |                 |              |                      | plastic mix B | -            |

## Body width

Table S14. PERMANOVA test results of the body width of produced neonates of the three *D. magna* clones BL2.2, K34J and Max4 during the experimental period. Nested PERMANOVA was performed with the time point of the measurements (1<sup>st</sup>, 3<sup>rd</sup> & 5<sup>th</sup> clutch as additional fixed factor and the body length as covariate to compensate for size-dependent differences. The interaction term body width  $\times$  body length was non-significant for all clones.

|              | Nested PERMANOVA                  |    |              |                            |    |                  |                                         |    |                  |
|--------------|-----------------------------------|----|--------------|----------------------------|----|------------------|-----------------------------------------|----|------------------|
| Fixed factor | Body width<br>(response variable) |    |              | Body length<br>(covariate) |    |                  | Time point<br>(additional fixed factor) |    |                  |
|              | Pseudo-F                          | df | p(MC)        | Pseudo-F                   | df | p(MC)            | Pseudo-F                                | df | p(MC)            |
| BL2.2        | 3.0163                            | 6  | <b>0.007</b> | 4683.2                     | 1  | <b>&lt;0.001</b> | 31.103                                  | 2  | <b>&lt;0.001</b> |
| K34J         | 1.5978                            | 6  | 0.148        | 6059.8                     | 1  | <b>&lt;0.001</b> | 19.185                                  | 2  | <b>&lt;0.001</b> |
| Max4         | 2.1584                            | 6  | 0.050        | 3443.4                     | 1  | <b>&lt;0.001</b> | 21.406                                  | 2  | <b>0.014</b>     |

Table S15. Pairwise comparisons of body width of produced neonates in the 1<sup>st</sup>, 3<sup>rd</sup> and 5<sup>th</sup> clutch.

|       |                        | Pairwise comparisons |               |              |
|-------|------------------------|----------------------|---------------|--------------|
|       |                        | Treatment A          | Treatment B   | p(MC)        |
| BL2.2 | 1 <sup>st</sup> clutch | control              | plastic mix A | <b>0.001</b> |
|       |                        |                      | plastic mix B | 0.171        |
|       | 3 <sup>rd</sup> clutch | control              | plastic mix A | 0.150        |
|       |                        |                      | plastic mix B | 0.160        |
|       | 5 <sup>th</sup> clutch | control              | plastic mix A | 0.178        |
|       |                        |                      | plastic mix B | 0.996        |
| Max   | 1 <sup>st</sup> clutch | control              | plastic mix A | 0.724        |
|       |                        |                      | plastic mix B | 0.067        |
|       | 3 <sup>rd</sup> clutch | control              | plastic mix A | 0.524        |
|       |                        |                      | plastic mix B | 0.678        |
|       | 5 <sup>th</sup> clutch | control              | plastic mix A | <b>0.011</b> |
|       |                        |                      | plastic mix B | 0.945        |

Table S16. PERMDISP test results of the body width of produced neonates of the three *D. magna* clones BL2.2, K34J and Max4. Individual PERMDISP tests were performed for each time point of the measurements (1<sup>st</sup>, 3<sup>rd</sup> & 5<sup>th</sup> clutch).

|       |            | PERMDISP                          |                 |                 |              |                      |               |              |
|-------|------------|-----------------------------------|-----------------|-----------------|--------------|----------------------|---------------|--------------|
|       |            | Body width<br>(response variable) |                 |                 |              | Pairwise comparisons |               |              |
|       | time point | F                                 | df <sub>1</sub> | df <sub>2</sub> | p(MC)        | Treatment A          | Treatment B   | p            |
| BL2.2 | 1st clutch | 0.8576                            | 2               | 267             | 0.440        | control              | plastic mix A | -            |
|       |            |                                   |                 |                 |              |                      | plastic mix B | -            |
|       | 3rd clutch | 3.2170                            | 2               | 267             | <b>0.045</b> | control              | plastic mix A | <b>0.037</b> |
|       |            |                                   |                 |                 |              |                      | plastic mix B | <b>0.032</b> |
|       | 5th clutch | 3.6843                            | 2               | 267             | <b>0.029</b> | control              | plastic mix A | <b>0.015</b> |
|       |            |                                   |                 |                 |              |                      | plastic mix B | 0.562        |
| K34J  | 1st clutch | 1.0003                            | 2               | 267             | 0.378        | control              | plastic mix A | -            |
|       |            |                                   |                 |                 |              |                      | plastic mix B | -            |
|       | 3rd clutch | 2.8187                            | 2               | 262             | 0.070        | control              | plastic mix A | -            |
|       |            |                                   |                 |                 |              |                      | plastic mix B | -            |
|       | 5th clutch | 1.3571                            | 2               | 257             | 0.260        | control              | plastic mix A | -            |
|       |            |                                   |                 |                 |              |                      | plastic mix B | -            |
| Max4  | 1st clutch | 0.7907                            | 2               | 267             | 0.461        | control              | plastic mix A | -            |
|       |            |                                   |                 |                 |              |                      | plastic mix B | -            |
|       | 3rd clutch | 3.0048                            | 2               | 257             | 0.057        | control              | plastic mix A | -            |
|       |            |                                   |                 |                 |              |                      | plastic mix B | -            |
|       | 5th clutch | 1.0697                            | 2               | 225             | 0.354        | control              | plastic mix A | -            |
|       |            |                                   |                 |                 |              |                      | plastic mix B | -            |

## Tail spine length

Table S17. PERMANOVA test results of the tail spine length of produced neonates of the three *D. magna* clones BL2.2, K34J and Max4 during the experimental period. Nested PERMANOVA was performed with the time point of the measurements (1<sup>st</sup>, 3<sup>rd</sup> & 5<sup>th</sup> clutch as additional fixed factor and the body length as covariate to compensate for size-dependent differences. The interaction term body width  $\times$  body length was non-significant for all clones.

|              | nested PERMANOVA                         |    |              |                            |    |        |                                         |    |        |
|--------------|------------------------------------------|----|--------------|----------------------------|----|--------|-----------------------------------------|----|--------|
| fixed factor | Tail spine length<br>(response variable) |    |              | Body length<br>(covariate) |    |        | Time point<br>(additional fixed factor) |    |        |
|              | Pseudo-F                                 | df | p(MC)        | Pseudo-F                   | df | p(MC)  | Pseudo-F                                | df | p(MC)  |
| BL2.2        | 0.67104                                  | 6  | 0.668        | 1993.9                     | 1  | <0.001 | 16.288                                  | 2  | <0.001 |
| K34J         | 0.48168                                  | 6  | <b>0.043</b> | 1298.5                     | 1  | <0.001 | 1.7538                                  | 2  | 0.170  |
| Max4         | 3.0704                                   | 6  | <b>0.008</b> | 2193.2                     | 1  | <0.001 | 186.84                                  | 2  | 0.014  |

Table S18. Pairwise comparisons of the tail spine length of produced neonates in the 1<sup>st</sup>, 3<sup>rd</sup> and 5<sup>th</sup> clutch.

|      |                        | Pairwise comparisons |               |              |
|------|------------------------|----------------------|---------------|--------------|
|      |                        | Treatment A          | Treatment B   | p(MC)        |
| K34J | 1 <sup>st</sup> clutch | control              | plastic mix A | 0.806        |
|      |                        |                      | plastic mix B | <b>0.012</b> |
|      | 3 <sup>rd</sup> clutch | control              | plastic mix A | 0.453        |
|      |                        |                      | plastic mix B | <b>0.036</b> |
|      | 5 <sup>th</sup> clutch | control              | plastic mix A | 1            |
|      |                        |                      | plastic mix B | 0.336        |
| Max4 | 1 <sup>st</sup> clutch | control              | plastic mix A | 0.217        |
|      |                        |                      | plastic mix B | 0.057        |
|      | 3 <sup>rd</sup> clutch | control              | plastic mix A | <b>0.669</b> |
|      |                        |                      | plastic mix B | 0.411        |
|      | 5 <sup>th</sup> clutch | control              | plastic mix A | <b>0.009</b> |
|      |                        |                      | plastic mix B | 0.461        |

Table S19. PERMDISP test results of the tail spine length of produced neonates of the three *D. magna* clones BL2.2, K34J and Max4. Individual PERMDISP tests were performed for each time point of the measurements (1<sup>st</sup>, 3<sup>rd</sup> & 5<sup>th</sup> clutch).

|       |            | PERMDISP                                 |                 |                 |        |                      |               |        |
|-------|------------|------------------------------------------|-----------------|-----------------|--------|----------------------|---------------|--------|
|       |            | Tail spine length<br>(response variable) |                 |                 |        | Pairwise comparisons |               |        |
|       | Time point | F                                        | df <sub>1</sub> | df <sub>2</sub> | p      | Treatment A          | Treatment B   | p      |
| BL2.2 | 1st clutch | 0.0412                                   | 2               | 267             | 0.963  | control              | plastic mix A | -      |
|       |            |                                          |                 |                 |        |                      | plastic mix B | -      |
|       | 3rd clutch | 8.4265                                   | 2               | 267             | <0.001 | control              | plastic mix A | 0.030  |
|       |            |                                          |                 |                 |        |                      | plastic mix B | <0.001 |
|       | 5th clutch | 1.6246                                   | 2               | 267             | 0.197  | control              | plastic mix A | -      |
|       |            |                                          |                 |                 |        |                      | plastic mix B | -      |
| K34J  | 1st clutch | 1.6266                                   | 2               | 267             | 0.207  | control              | plastic mix A | -      |
|       |            |                                          |                 |                 |        |                      | plastic mix B | -      |
|       | 3rd clutch | 0.4809                                   | 2               | 262             | 0.641  | control              | plastic mix A | -      |
|       |            |                                          |                 |                 |        |                      | plastic mix B | -      |
|       | 5th clutch | 0.3706                                   | 2               | 257             | 0.716  | control              | plastic mix A | -      |
|       |            |                                          |                 |                 |        |                      | plastic mix B | -      |
| Max4  | 1st clutch | 2.2055                                   | 2               | 267             | 0.118  | control              | plastic mix A | -      |
|       |            |                                          |                 |                 |        |                      | plastic mix B | -      |
|       | 3rd clutch | 0.7788                                   | 2               | 257             | 0.464  | control              | plastic mix A | -      |
|       |            |                                          |                 |                 |        |                      | plastic mix B | -      |
|       | 5th clutch | 1.3121                                   | 2               | 224             | 0.272  | control              | plastic mix A | -      |
|       |            |                                          |                 |                 |        |                      | plastic mix B | -      |
